# Supplementary material
Source: Springer Nature journal article supplement (https://www.springermedizin.de/resource/supplementary/12939_2013_412_MOESM6_ESM.pdf/9551118)

**Beds**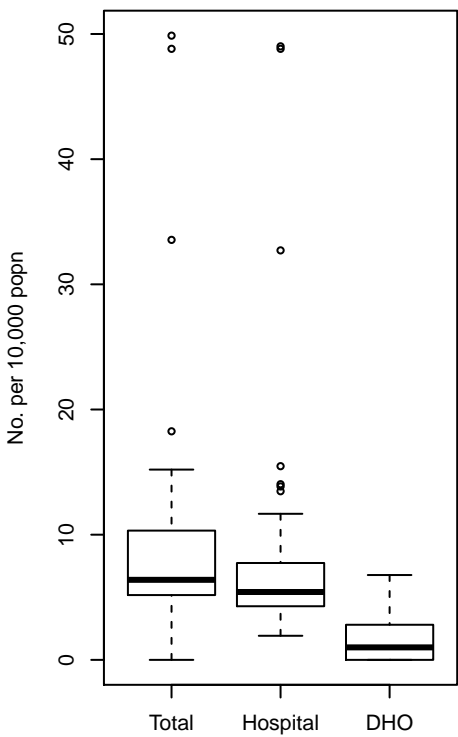**Doctors**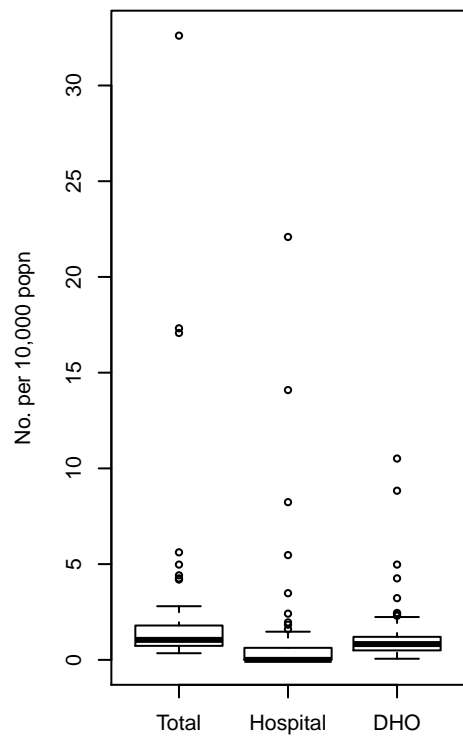**Nurses**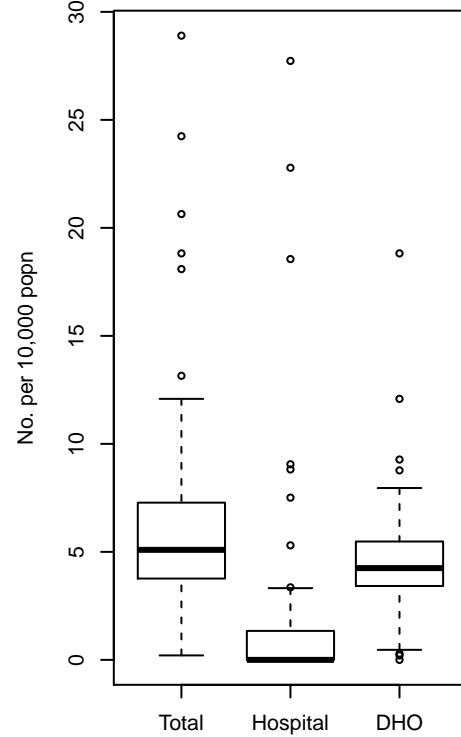**Oseltamivir**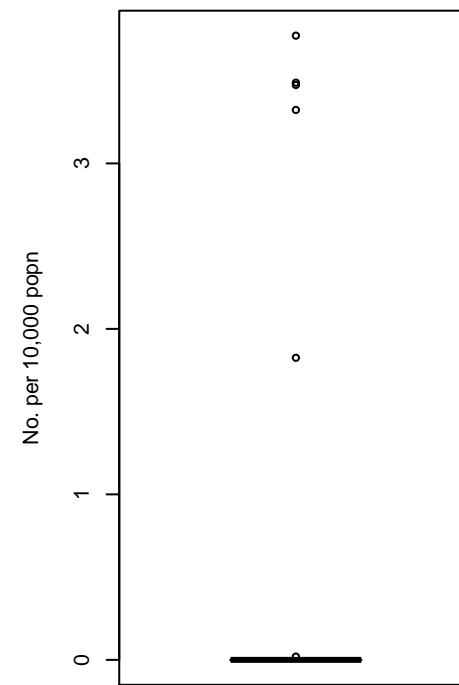**Ventilators**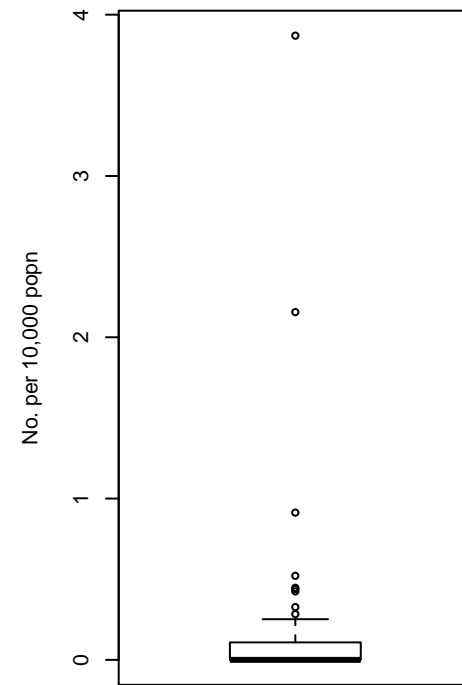**Beds**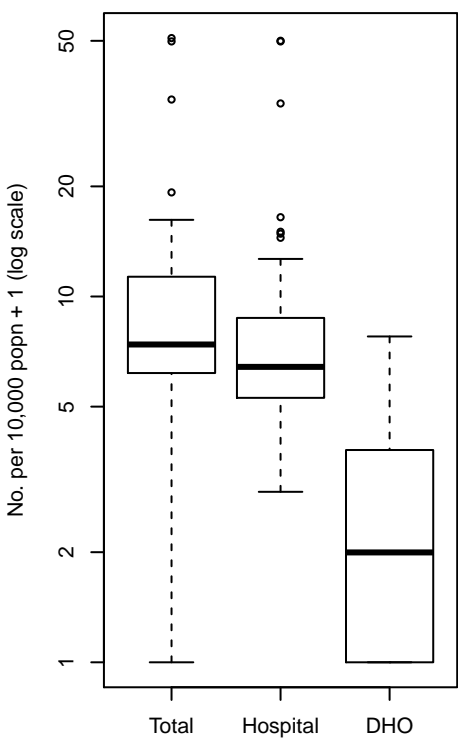**Doctors**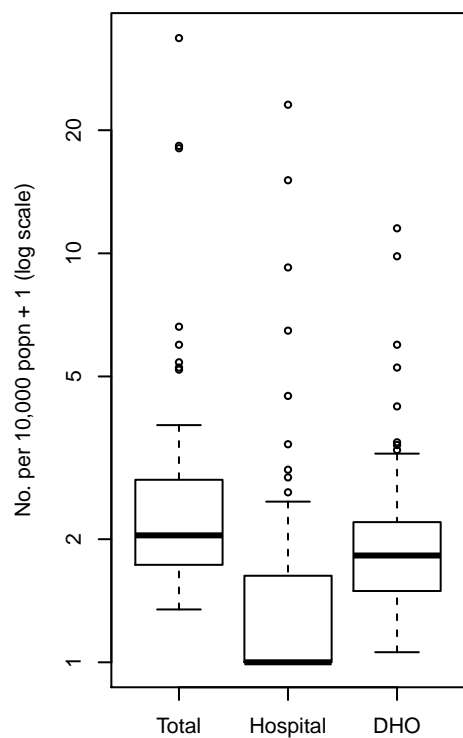**Nurses**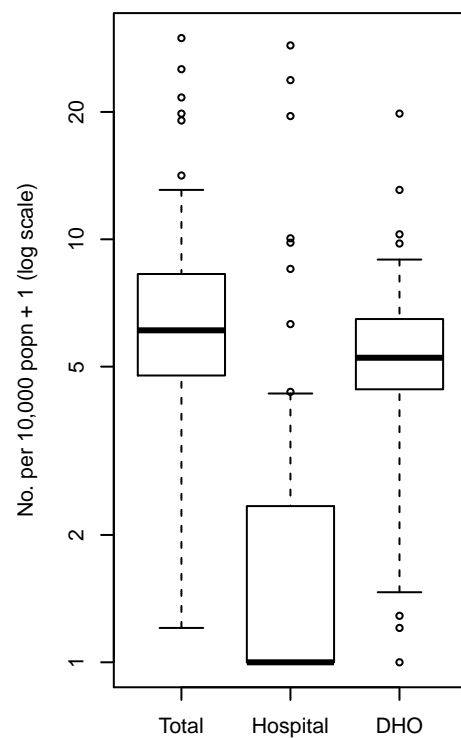**Oseltamivir**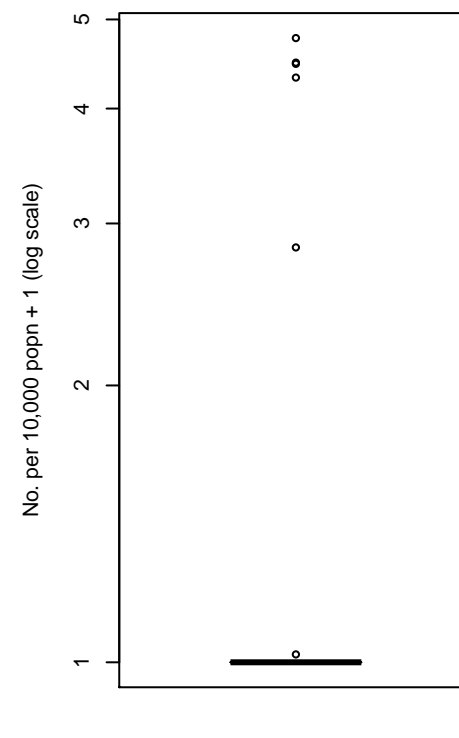**Ventilators**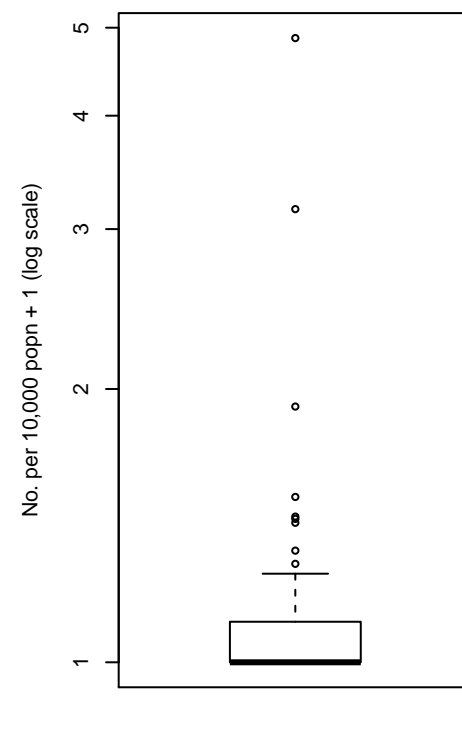

Supplement: MOESM6 [file 9551118]
